# Supplementary material
Source: Springer Nature journal article supplement (https://www.springermedizin.de/resource/supplementary/12891_2013_1942_MOESM4_ESM.pdf/9508842)

**A**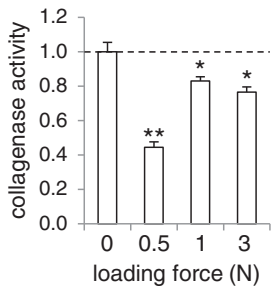**B**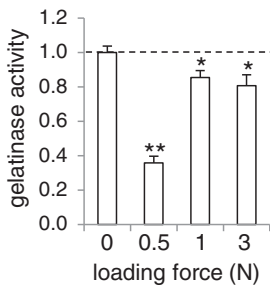**C**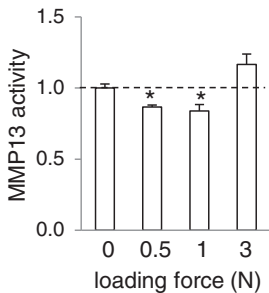**D**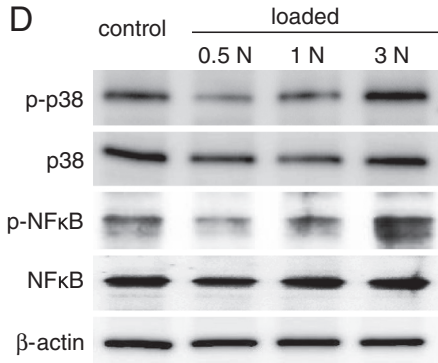

Supplement: MOESM4 [file 9508842]
